# Supplementary material for: Implementation of a National Reference Laboratory for Buruli Ulcer Disease in Togo
Source: PubMed Central journal article supplement (PMC3554568; doi:10.1371/journal.pntd.0002011), 2013-01-24
Supplement: pntd.0002011.s001.pdf [file pntd.0002011.s001.pdf]

**Laboratory Data Entry Form**

Date ..... 201.....

Use separate form for each "visit" and each lesion (if multiple lesions) per patient!

**A: Patient ID** .....**Hospital** .....**Family name** .....**First name** .....**Village** .....**District** .....**Age** .....years**Sex**  m  f**BCG Scar**  yes  no**B: Classification**  **New case** **Recurrence****C: Clinical Presentation****&****Number of lesions** Nodule Papule Plaque Single lesion Ulcer Edema Osteomyelitisor  Multiple lesions (.....)**D: Visit (Time of sample collection)** pre-treatment (V1) other: week.....**E: Duration of Disease**

..... day(s) ..... week(s) ..... month(s)

**F: Location of the Lesion**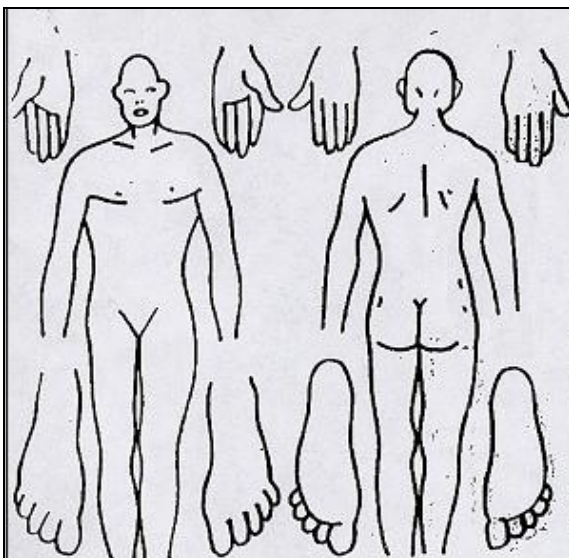

Dosage of Rifampicin : ..... mg/d

Dosage of Streptomycin : ..... g/d

Dosage of other (name) : .....

Treatment Start Date : .....

(Photographical) documentation:

 no  yes, by: .....

**G: Clinical samples**

### Nodule, Papule, Plaque, Edema

Ø of lesion ..... / ..... mm

Category .....

|                                                               |                                       |                                         |  |  |  |
|---------------------------------------------------------------|---------------------------------------|-----------------------------------------|--|--|--|
| MIC (CHR/INH/DITM) + PCR (INH)* - PCR (INH)** - PCR (DITM)*** |                                       |                                         |  |  |  |
| FNA* <input type="radio"/>                                    | Punch biopsy** <input type="radio"/>  | Tissue surgery** <input type="radio"/>  |  |  |  |
| FNA*** <input type="radio"/>                                  | Punch biopsy*** <input type="radio"/> | Tissue surgery*** <input type="radio"/> |  |  |  |

### Ulcer

Ø of lesion ..... / ..... mm

Category .....

|                                                                                      |                               |                                        |  |  |  |
|--------------------------------------------------------------------------------------|-------------------------------|----------------------------------------|--|--|--|
| MIC (CHR/INH/DITM)* - MIC (CHR/INH/DITM) + PCR (INH)** - PCR (INH)*** PCR (DITM)**** |                               |                                        |  |  |  |
| Swab* <input type="radio"/>                                                          | FNA** <input type="radio"/>   | Punch biopsy*** <input type="radio"/>  |  |  |  |
| Swab*** <input type="radio"/>                                                        | FNA**** <input type="radio"/> | Punch biopsy**** <input type="radio"/> |  |  |  |
| Swab**** <input type="radio"/>                                                       |                               |                                        |  |  |  |

**H: Remarks**
