# Supplementary material for: Implementation of a National Reference Laboratory for Buruli Ulcer Disease in Togo
Source: PubMed Central journal article supplement (PMC3554568; doi:10.1371/journal.pntd.0002011), 2013-01-24
Supplement: pntd.0002011.s002.pdf [file pntd.0002011.s002.pdf]

| <b>MIC résultat</b>                             | <b>BuruliVac – Togo<br/>CHR Tsévié</b>         |
|-------------------------------------------------|------------------------------------------------|
| No ID BuruliVac d'échantillon : _____           |                                                |
| Nom du patient :                                |                                                |
| Date d'arrivée :                                |                                                |
| Date de la lecture :                            |                                                |
| <b>Résultat</b>                                 | <b>Code</b>                                    |
| Plus de 10 BAAR / champ au moins dans 20 champs | +++ (positive)                                 |
| 1 – 10 BAAR / champ                             | ++ (positive)                                  |
| 10 – 99 BAAR / 100 champs                       | + (positive)                                   |
| 1-9 BAAR / 100 champs                           | Marquer le nombre exact/ 100 champs (positive) |
| Aucun BAAR dans au moins 100 champs             | - (negative)                                   |

### CHR – Tsévié

#### 1<sup>ier</sup> lecture

3+     2+     1+     Nombre exact :     neg

#### 2<sup>ième</sup> lecture (optionnel)

3+     2+     1+     Nombre exact :     neg

#### 3<sup>ième</sup> lecture (si les résultats de la 1<sup>ère</sup> et 2<sup>ième</sup> lecture sont discordants)

3+     2+     1+     Nombre exact :     neg

#### Résultat final

3+     2+     1+     Nombre exact :     neg

Lecture impossible

Raison:

Nouvelle lame demandé

Commentaire :

| MIC résultat                                    | BuruliVac – Togo<br>INH Lomé                   |
|-------------------------------------------------|------------------------------------------------|
| No ID BuruliVac d'échantillon : _____           |                                                |
| Nom du patient :                                |                                                |
| Date d'arrivée :                                |                                                |
| Date de la lecture :                            |                                                |
| Résultat                                        | Code                                           |
| Plus de 10 BAAR / champ au moins dans 20 champs | +++ (positive)                                 |
| 1 – 10 BAAR / champ                             | ++ (positive)                                  |
| 10 – 99 BAAR / 100 champs                       | + (positive)                                   |
| 1-9 BAAR / 100 champs                           | Marquer le nombre exact/ 100 champs (positive) |
| Aucun BAAR dans au moins 100 champs             | - (negative)                                   |

**Institut National d'Hygiène, Lomé: EQA, 1<sup>ère</sup> étape**

**1<sup>ère</sup> lecture**

3+     2+     1+     Nombre exact :                       neg

**2<sup>ème</sup> lecture (optionnel)**

3+     2+     1+     Nombre exact :                       neg

**3<sup>ème</sup> lecture (si les résultats de la 1<sup>ère</sup> et 2<sup>ème</sup> lecture sont discordants)**

3+     2+     1+     Nombre exact :                       neg

**Résultat final INH (EQA 1)**

3+     2+     1+     Nombre exact :                       neg

**Commentaire (ex: qualité de la colorisation) :**

| <b>MIC résultat<br/>Révision</b>                                                                               | <b>BuruliVac – Togo<br/>INH Lomé – CHR Tsévié</b> |
|----------------------------------------------------------------------------------------------------------------|---------------------------------------------------|
| <b>No ID BuruliVac d'échantillon :</b> _____<br><br><b>Nom du patient :</b><br><br><b>Date de la lecture :</b> |                                                   |
| Résultat                                                                                                       | Code                                              |
| Plus de 10 BAAR / champ au moins dans 20 champs                                                                | +++ (positive)                                    |
| 1 – 10 BAAR / champ                                                                                            | ++ (positive)                                     |
| 10 – 99 BAAR / 100 champs                                                                                      | + (positive)                                      |
| 1-9 BAAR / 100 champs                                                                                          | Marquer le nombre exact/ 100 champs (positive)    |
| Aucun BAAR dans au moins 100 champs                                                                            | - (negative)                                      |

**Institut National d'Hygiène, Lomé – CHR, Tsévié**

Révision de l'analyse à cause des résultats discordants d'INH et du CHR, Tsévié

**Résultat final d'INH et du CHR, Togo (Les deux lecteurs ensemble)**

3+   
  2+   
  1+   
  Nombre exact :                     
  neg

**Commentaire:**
